# Supplementary material for: Zinc Anode for Mild Aqueous Zinc-Ion Batteries: Challenges, Strategies, and Perspectives
Source: PubMed Central journal article supplement (PMC8724388; doi:10.1007/s40820-021-00782-5), 2022-01-03
Supplement: 40820_2021_782_MOESM1_ESM.pdf [file 40820_2021_782_MOESM1_ESM.pdf]

Supporting Information for

**Zinc Anode for Mild Aqueous Zinc-Ion Batteries: Challenges, Strategies, and Perspectives**Jinzhang Yang<sup>1</sup>, Bosi Yin<sup>1</sup>, Ying Sun<sup>1</sup>, Hongge Pan<sup>2,3</sup>, Wenping Sun<sup>3</sup>, Baohua Jia<sup>4</sup>, Siwen Zhang<sup>1,\*</sup>, Tianyi Ma<sup>4,\*</sup><sup>1</sup>Institute of Clean Energy Chemistry, Key Laboratory for Green Synthesis and Preparative Chemistry of Advanced Materials of Liaoning Province, College of Chemistry, Liaoning University, Shenyang 110036, P. R. China<sup>2</sup>Institute of Science and Technology for New Energy, Xi'an Technological University, Xi'an 710021, P. R. China<sup>3</sup>School of Materials Science and Engineering, State Key Laboratory of Clean Energy Utilization, Zhejiang University, Hangzhou 310027, P. R. China<sup>4</sup>Centre for Translational Atomaterials, Swinburne University of Technology, Hawthorn, VIC 3122, Australia\*Corresponding authors. E-mail: [zhangsiwen@lnu.edu.cn](mailto:zhangsiwen@lnu.edu.cn) (S. Zhang); [tianyima@swin.edu.au](mailto:tianyima@swin.edu.au) (T. Ma)**Supplementary Table****Table S1** Summary of the electrochemical performance for some mild aqueous ZIBs

| Anode                        | Electrolyte                                     | Current density (mA cm <sup>-2</sup> ) | Area capacity (mAh cm <sup>-2</sup> ) | Performance of pristine symmetric batteries |              | Performance of improved symmetric batteries |              | Refs. |
|------------------------------|-------------------------------------------------|----------------------------------------|---------------------------------------|---------------------------------------------|--------------|---------------------------------------------|--------------|-------|
|                              |                                                 |                                        |                                       | Voltage hysteresis (mV)                     | Lifespan (h) | Voltage hysteresis (mV)                     | Lifespan (h) |       |
| Nafion-Zn-X layer            | 2 M ZnSO <sub>4</sub>                           | 2                                      | 0.5                                   | 90                                          | 71 cycles    | 50                                          | 1000 cycles  | [S1]  |
| HsGDY layer                  | 2 M ZnSO <sub>4</sub>                           | 2                                      | 0.1                                   | ~228                                        | 63           | ~120                                        | >2400        | [S2]  |
| Nanoporous CaCO <sub>3</sub> | 3 M ZnSO <sub>4</sub> + 0.1 M MnSO <sub>4</sub> | 0.25                                   | 0.05                                  | 230                                         | 55           | 80                                          | 836          | [S3]  |
| Cyanoacrylate layer          | 2 M ZnSO <sub>4</sub>                           | 2                                      | 1                                     | ~91.3                                       | ~60          | ~111.2                                      | 400          | [S4]  |
| 3D ZnF <sub>2</sub> layer    | 2 M ZnSO <sub>4</sub>                           | 1                                      | 1.0                                   | 128                                         | #            | ~71.5                                       | 800          | [S5]  |
| Polyimide layer              | 2 M ZnSO <sub>4</sub>                           | 4                                      | 2                                     | ~100                                        | 105          | 25                                          | 300          | [S6]  |
| Zn@ZnO-3D                    | 3 M ZnSO <sub>4</sub> + 0.1 M MnSO <sub>4</sub> | 5                                      | 1.25                                  | #                                           | #            | 43                                          | 500          | [S7]  |
| Graphite                     | 2 M ZnSO <sub>4</sub>                           | 0.1                                    | 0.1                                   | #                                           | ~70          | ~28                                         | 200          | [S8]  |
| 3D carbon nanotube           | 2 M ZnSO <sub>4</sub>                           | 2                                      | 2                                     | #                                           | 50           | 27                                          | 200          | [S9]  |
| MXene layer                  | 2 M ZnSO <sub>4</sub>                           | 0.2                                    | 0.2                                   | ~125                                        | 167          | 47                                          | 800          | [S10] |
| ZIF-8 layer                  | 2 M ZnSO <sub>4</sub>                           | 2                                      | 1                                     | ~60                                         | 130          | ~58                                         | 1200         | [S11] |
| Au nanoparticles             | 3 M ZnSO <sub>4</sub>                           | 0.25                                   | 0.05                                  | ~80                                         | 92           | ~60                                         | 2000         | [S12] |

Nano-Micro Letters

|                                                              |                                                       |       |       |      |           |       |             |       |
|--------------------------------------------------------------|-------------------------------------------------------|-------|-------|------|-----------|-------|-------------|-------|
| Sn coating                                                   | 2 M ZnSO <sub>4</sub>                                 | 1     | 0.5   | ~130 | 120       | 50    | 500         | [S13] |
| Cu interfacial layer                                         | 3 M ZnSO <sub>4</sub> + 0.1 M MnSO <sub>4</sub>       | 5     | 2     | ~75  | 84        | 31.5  | 1500        | [S14] |
| Ag interfacial layer                                         | 3 M ZnSO <sub>4</sub> + 0.1 M MnSO <sub>4</sub>       | 5     | 2     | ~75  | 84        | 28.3  | 448         | [S15] |
| liquid Ga-In alloy coating                                   | 3 M ZnSO <sub>4</sub>                                 | 0.25  | 0.05  | 72   | 80        | 24    | 2100        | [S16] |
| liquid Ga-In-Zn alloy layer                                  | 2 M ZnSO <sub>4</sub>                                 | 1     | 0.5   | #    | 100       | ~20   | 500         | [S17] |
| In microparticles                                            | 2 M ZnSO <sub>4</sub>                                 | 0.2   | 0.2   | 261  | ~150      | 54    | 1500        | [S18] |
| β-PVDF                                                       | 2 M ZnSO <sub>4</sub>                                 | 0.25  | 0.05  | ~165 | 350       | 80    | 2000        | [S19] |
| AEC coating                                                  | 2 M ZnSO <sub>4</sub>                                 | 0.885 | 0.885 | <50  | ~450      | <50   | 2000        | [S20] |
| Alucone                                                      | 3 M Zn(SO <sub>3</sub> CF <sub>3</sub> ) <sub>2</sub> | 3     | 1     | 84.3 | 70        | 110.3 | 780         | [S21] |
| Cu mesh                                                      | 1 M ZnSO <sub>4</sub>                                 | 1     | 1     | >35  | 60        | 20    | 340         | [S22] |
| 3D Ni-Zn anode                                               | 2 M ZnSO <sub>4</sub>                                 | 5     | 2     | 160  | 20        | 80    | 200         | [S23] |
| 3D nanoporous Zn                                             | 2 M Zn(CF <sub>3</sub> SO <sub>3</sub> ) <sub>2</sub> | 0.5   | 0.1   | ~100 | 220       | 60    | 1400        | [S24] |
| Copper foam                                                  | 2 M ZnSO <sub>4</sub> + 0.1 M MnSO <sub>4</sub>       | 2     | 1     | #    | ~145      | ~40   | 150         | [S25] |
| 3D porous copper skeleton                                    | 2 M ZnSO <sub>4</sub>                                 | 0.5   | 0.5   | 100  | 110       | 40    | 350         | [S26] |
| 3D ridge structure Zn                                        | 3 M ZnSO <sub>4</sub>                                 | 1     | 0.5   | 72   | 39        | 20    | 200         | [S27] |
| 3D ZnP/CF                                                    | 2 M ZnSO <sub>4</sub>                                 | 1     | 1     | 482  | 170       | 25.1  | 3000        | [S28] |
| Carbon fiber                                                 | 3 M Zn(CF <sub>3</sub> SO <sub>3</sub> ) <sub>2</sub> | 0.25  | 0.125 | 80   | 110       | 46    | 200         | [S29] |
| Graphite fiber                                               | 0.5 M NaSO <sub>4</sub> + 0.05 M ZnSO <sub>4</sub>    | 1     | 1     | ~100 | 50 cycles | ~50   | 350 cycles  | [S30] |
| ZIF-8-500 layer                                              | 2 M ZnSO <sub>4</sub>                                 | 2     | 1     | #    | #         | #     | >200 cycles | [S31] |
| Ti <sub>3</sub> C <sub>2</sub> T <sub>x</sub> MXene@Zn paper | 2 M ZnSO <sub>4</sub>                                 | 1     | 1     | >109 | ~78       | ~83   | 300         | [S32] |
| Cu-Zn nanoalloy                                              | 3 M ZnSO <sub>4</sub>                                 | 1     | 0.5   | >400 | #         | ~46   | 1500        | [S33] |
| Eutectic Zn <sub>88</sub> Al <sub>12</sub> alloy             | 2 M ZnSO <sub>4</sub>                                 | 0.5   | 0.5   | ~101 | ~50       | ~20   | 2000        | [S34] |
| 3D Zn-Mn alloy                                               | 2 M ZnSO <sub>4</sub> in seawater                     | 80    | 16    | ~600 | <30       | ~300  | 760         | [S35] |
| Zn                                                           | ZnSO <sub>4</sub> + glucose                           | 1     | 1     | #    | 300       | #     | 2000        | [S36] |
| Zn                                                           | ZnSO <sub>4</sub> + glycerol                          | 2     | 6     | #    | 100       | #     | 900         | [S37] |
| Zn                                                           | ZnSO <sub>4</sub> + amino acid                        | 5     | 4     | #    | 70        | #     | 2200        | [S38] |
| Zn                                                           | ZnSO <sub>4</sub> + ZnF <sub>2</sub>                  | 1     | 1     | 165  | ~80       | 124   | 600         | [S39] |
| Zn                                                           | ZnSO <sub>4</sub> + KPF <sub>6</sub>                  | 2     | 4     | #    | 95        | #     | 1200        | [S40] |
| Zn                                                           | ZPSAM                                                 | 2     | 0.5   | #    | 55        | #     | 1000        | [S41] |
| Zn                                                           | PAMPSZn                                               | 1     | 1     | #    | 139       | 100   | 4500        | [S42] |
| Zn                                                           | PVHF/MXene-g-PMA <sup>0.05</sup>                      | 0.2   | 0.2   | #    | #         | #     | 1200        | [S43] |

## Supplementary References

- [S1] Y. Cui, Q. Zhao, X. Wu, X. Chen, J. Yang et al., An interface-bridged organic–inorganic layer that suppresses dendrite formation and side reactions for ultra-long-life aqueous zinc metal anodes. *Angew. Chem. Int. Ed.* **59**(38), 16594–16601 (2020). <https://doi.org/10.1002/anie.202005472>
- [S2] Q. Yang, Y. Guo, B. Yan, C. Wang, Z. Liu et al., Hydrogen-substituted graphdiyne ion tunnels directing concentration redistribution for commercial-grade dendrite-free zinc anodes. *Adv. Mater.* **32**(25), 2001755 (2020). <https://doi.org/10.1002/adma.202001755>
- [S3] L. Kang, M. Cui, F. Jiang, Y. Gao, H. Luo et al., Nanoporous CaCO<sub>3</sub> coatings enabled uniform Zn stripping/pating for long-life zinc rechargeable aqueous batteries. *Adv. Energy Mater.* **8**(25), 1801090 (2018). <https://doi.org/10.1002/aenm.201801090>
- [S4] Z. Cao, X. Zhu, D. Xu, P. Dong, M.O.L. Chee et al., Eliminating Zn dendrites by commercial cyanoacrylate adhesive for zinc ion battery. *Energy Storage Mater.* **36**, 132–138 (2021). <https://doi.org/10.1016/j.ensm.2020.12.022>
- [S5] Y. Yang, C. Liu, Z. Lv, H. Yang, Y. Zhang et al., Synergistic manipulation of Zn<sup>2+</sup> ion flux and desolvation effect enabled by anodic growth of a 3D ZnF<sub>2</sub> matrix for long-lifespan and dendrite-free Zn metal anodes. *Adv. Mater.* **33**(11), 2007388 (2021). <https://doi.org/10.1002/adma.202007388>
- [S6] M. Zhu, J. Hu, Q. Lu, H. Dong, D.D. Karnaushenko et al., A patternable and in situ formed polymeric zinc blanket for a reversible zinc anode in a skin-mountable microbattery. *Adv. Mater.* **33**(8), 2007497 (2021). <https://doi.org/10.1002/adma.202007497>
- [S7] X. Xie, S. Liang, J. Gao, S. Guo, J. Guo et al., Manipulating the ion-transfer kinetics and interface stability for high-performance zinc metal anodes. *Energy Environ. Sci.* **13**(2), 503–510 (2020). <https://doi.org/10.1039/c9ee03545a>
- [S8] Z. Li, L. Wu, S. Dong, T. Xu, S. Li et al., Pencil drawing stable interface for reversible and durable aqueous zinc-ion batteries. *Adv. Funct. Mater.* **31**(4), 2006495 (2021). <https://doi.org/10.1002/adfm.202006495>
- [S9] L. Dong, W. Yang, W. Yang, H. Tian, Y. Huang et al., Flexible and conductive scaffold-stabilized zinc metal anodes for ultralong-life zinc-ion batteries and zinc-ion hybrid capacitors. *Chem. Eng. J.* **384**, 123355 (2020). <https://doi.org/10.1016/j.cej.2019.123355>
- [S10] N. Zhang, S. Huang, Z. Yuan, J. Zhu, Z. Zhao et al., Direct self-assembly of MXene on Zn anodes for dendrite-free aqueous zinc-ion batteries. *Angew. Chem. Int. Ed.* **60**(6), 2861–2865 (2021). <https://doi.org/10.1002/anie.202012322>
- [S11] R. Yuksel, O. Buyukcakir, W.K. Seong, R.S. Ruoff, Metal-organic framework integrated anodes for aqueous zinc-ion batteries. *Adv. Energy Mater.* **10**(16), 1904215 (2020). <https://doi.org/10.1002/aenm.201904215>
- [S12] M. Cui, Y. Xiao, L. Kang, W. Du, Y. Gao et al., Quasi-isolated Au particles as heterogeneous seeds to guide uniform Zn deposition for aqueous zinc-ion batteries. *ACS Appl. Energy Mater.* **2**(9), 6490–6496 (2019). <https://doi.org/10.1021/acsaem.9b01063>

- [S13] Y. Yin, S. Wang, Q. Zhang, Y. Song, N. Chang et al., Dendrite-free zinc deposition induced by tin-modified multifunctional 3D host for stable zinc-based flow battery. *Adv. Mater.* **32**(6), 1906803 (2020). <https://doi.org/10.1002/adma.201906803>
- [S14] Y. Zhang, G. Wang, F. Yu, G. Xu, Z. Li et al., Highly reversible and dendrite-free Zn electrodeposition enabled by a thin metallic interfacial layer in aqueous batteries. *Chem. Eng. J.* **416**, 128062 (2021). <https://doi.org/10.1016/j.cej.2020.128062>
- [S15] Y. Wang, Y. Chen, W. Liu, X. Ni, P. Qing et al., Uniform and dendrite-free zinc deposition enabled by in situ formed AgZ<sub>3</sub> for the zinc metal anode. *J. Mater. Chem. A* **9**(13), 8452–8461 (2021). <https://doi.org/10.1039/D0TA12177K>
- [S16] C. Liu, Z. Luo, W. Deng, W. Wei, L. Chen et al., Liquid alloy interlayer for aqueous zinc-ion battery. *ACS Energy Lett.* **6**(2), 675–683 (2021). <https://doi.org/10.1021/acseenergylett.0c02569>
- [S17] H. Jia, Z. Wang, M. Dirican, S. Qiu, C.Y. Chan et al., A liquid metal assisted dendrite-free anode for high-performance Zn-ion batteries. *J. Mater. Chem. A* **9**(9), 5597–5605 (2021). <https://doi.org/10.1039/d0ta11828a>
- [S18] D. Han, S. Wu, S. Zhang, Y. Deng, C. Cui et al., A corrosion-resistant and dendrite-free Zinc metal anode in aqueous systems. *Small* **16**(29), 2001736 (2020). <https://doi.org/10.1002/sml.202001736>
- [S19] L.T. Hieu, S. So, I.T. Kim, J. Hur, Zn anode with flexible  $\beta$ -PVDF coating for aqueous Zn-ion batteries with long cycle life. *Chem. Eng. J.* **411**, 128584 (2021). <https://doi.org/10.1016/j.cej.2021.128584>
- [S20] R. Zhao, Y. Yang, G. Liu, R. Zhu, J. Huang et al., Redirected Zn electrodeposition by an anti-corrosion elastic constraint for highly reversible Zn anodes. *Adv. Funct. Mater.* **31**(2), 2001867 (2021). <https://doi.org/10.1002/adfm.202001867>
- [S21] H. He, J. Liu, Suppressing Zn dendrite growth by molecular layer deposition to enable long-life and deeply rechargeable aqueous Zn anodes. *J. Mater. Chem. A* **8**(42), 22100–22110 (2020). <https://doi.org/10.1039/d0ta07232j>
- [S22] Q. Zhang, J. Luan, X. Huang, L. Zhu, Y. Tang et al., Simultaneously regulating the ion distribution and electric field to achieve dendrite-free Zn anode. *Small* **16**(35), 2000929 (2020). <https://doi.org/10.1002/sml.202000929>
- [S23] G. Zhang, X. Zhang, H. Liu, J. Li, Y. Chen et al., 3D-printed multi-channel metal lattices enabling localized electric-field redistribution for dendrite-free aqueous Zn ion batteries. *Adv. Energy Mater.* **11**(19), 2003927 (2021). <https://doi.org/10.1002/aenm.202003927>
- [S24] W. Guo, Z. Cong, Z. Guo, C. Chang, X. Liang et al., Dendrite-free Zn anode with dual channel 3D porous frameworks for rechargeable Zn batteries. *Energy Storage Mater.* **30**, 104–112 (2020). <https://doi.org/10.1016/j.ensm.2020.04.038>
- [S25] C. Li, X. Shi, S. Liang, X. Ma, M. Han et al., Spatially homogeneous copper foam as surface dendrite-free host for zinc metal anode. *Chem. Eng. J.* **379**, 122248 (2020). <https://doi.org/10.1016/j.cej.2019.122248>
- [S26] Z. Kang, C. Wu, L. Dong, W. Liu, J. Mou et al., 3D porous copper skeleton supported zinc anode toward high capacity and long cycle life zinc ion batteries. *ACS Sustain. Chem. Eng.* **7**(3), 3364–3371 (2019). <https://doi.org/10.1021/acssuschemeng.8b05568>
- [S27] J. Wang, Z. Cai, R. Xiao, Y. Ou, R. Zhan et al., A chemically polished zinc metal electrode with a ridge-like structure for cycle-stable aqueous batteries. *ACS Appl.*

- Mater. Interfaces **12**(20), 23028–23034 (2020).  
<https://doi.org/10.1021/acsami.0c05661>
- [S28] Y. Du, X. Chi, J. Huang, Q. Qiu, Y. Liu, Long lifespan and high-rate Zn anode boosted by 3D porous structure and conducting network. *J. Power Sources*. **479**, 228808 (2020). <https://doi.org/10.1016/j.jpowsour.2020.228808>
- [S29] S. Zhai, N. Wang, X. Tan, K. Jiang, Z. Quan et al., Interface-engineered dendrite-free anode and ultraconductive cathode for durable and high-rate fiber Zn dual-ion microbattery. *Adv. Funct. Mater.* **31**(13), 2008894 (2021).  
<https://doi.org/10.1002/adfm.202008894>
- [S30] L.P. Wang, N.W. Li, T.S. Wang, Y.X. Yin, Y.G. Guo et al., Conductive graphite fiber as a stable host for zinc metal anodes. *Electrochim. Acta* **244**, 172–177 (2017).  
<https://doi.org/10.1016/j.electacta.2017.05.072>
- [S31] Z. Wang, J. Huang, Z. Guo, X. Dong, Y. Liu et al., A metal-organic framework host for highly reversible dendrite-free zinc metal anodes. *Joule* **3**(5), 1289–1300 (2019).  
<https://doi.org/10.1016/j.joule.2019.02.012>
- [S32] Y. Tian, Y. An, C. Wei, B. Xi, S. Xiong et al., Flexible and free-standing  $\text{Ti}_3\text{C}_2\text{T}_x$  MXene@Zn paper for dendrite-free aqueous zinc metal batteries and nonaqueous lithium metal batteries. *ACS Nano* **13**(10), 11676–11685 (2019).  
<https://doi.org/10.1021/acs.nano.9b05599>
- [S33] Z. Cai, Y. Ou, J. Wang, R. Xiao, L. Fu et al., Chemically resistant Cu–Zn/Zn composite anode for long cycling aqueous batteries. *Energy Storage Mater.* **27**, 205–211 (2020). <https://doi.org/10.1016/j.ensm.2020.01.032>
- [S34] S.B. Wang, Q. Ran, R.Q. Yao, H. Shi, Z. Wen et al., Lamella-nanostructured eutectic zinc–aluminum alloys as reversible and dendrite-free anodes for aqueous rechargeable batteries. *Nat. Commun.* **11**, 1634 (2020). <https://doi.org/10.1038/s41467-020-15478-4>
- [S35] H. Tian, Z. Li, G. Feng, Z. Yang, D. Fox et al., Stable, high-performance, dendrite-free, seawater-based aqueous batteries. *Nat. Commun.* **12**, 237 (2021).  
<https://doi.org/10.1038/s41467-020-20334-6>
- [S36] P. Sun, L. Ma, W. Zhou, M. Qiu, Z. Wang et al., Simultaneous regulation on solvation shell and electrode interface for dendrite-free Zn ion batteries achieved by a low-cost glucose additive. *Angew. Chem. Int. Ed.* **60**(33), 18247–18255 (2021).  
<https://doi.org/10.1002/anie.202105756>
- [S37] Y. Zhang, M. Zhu, K. Wu, F. Yu, G. Wang et al., An in-depth insight of a highly reversible and dendrite-free Zn metal anode in an hybrid electrolyte. *J. Mater. Chem. A* **9**(7), 4253–4261 (2021). <https://doi.org/10.1039/d0ta11668h>
- [S38] H. Lu, X. Zhang, M. Luo, K. Cao, Y. Lu et al., Amino acid-induced interface charge engineering enables highly reversible Zn anode. *Adv. Funct. Mater.* **31**(45), 2103514 (2021). <https://doi.org/10.1002/adfm.202103514>
- [S39] D. Li, L. Cao, T. Deng, S. Liu, C. Wang, Design of a solid electrolyte interphase for aqueous Zn batteries. *Angew. Chem. Int. Ed.* **60**(23), 13035–13041 (2021).  
<https://doi.org/10.1002/anie.202103390>
- [S40] Y. Chu, S. Zhang, S. Wu, Z. Hu, G. Cui et al., In situ built interphase with high interface energy and fast kinetics for high performance Zn metal anodes. *Energy Environ. Sci.* **14**(6), 3609–3620 (2021). <https://doi.org/10.1039/D1EE00308A>

- [S41] L. Ma, S. Chen, N. Li, Z. Liu, Z. Tang et al., Hydrogen-free and dendrite-free all-solid-state Zn-ion batteries. *Adv. Mater.* **32**(14), 1908121 (2020).  
<https://doi.org/10.1002/adma.201908121>
- [S42] J. Cong, X. Shen, Z. Wen, X. Wang, L. Peng et al., Ultra-stable and highly reversible aqueous zinc metal anodes with high preferred orientation deposition achieved by a polyanionic hydrogel electrolyte. *Energy Storage Mater.* **35**, 586–594 (2021).  
<https://doi.org/10.1016/j.ensm.2020.11.041>
- [S43] Z. Chen, X. Li, D. Wang, Q. Yang, L. Ma et al., Grafted MXene/polymer electrolyte for high performance solid zinc batteries with enhanced shelf life at low/high temperatures. *Energy Environ. Sci.* **14**(6), 3492–3501 (2021).  
<https://doi.org/10.1039/D1EE00409C>
